# Supplementary material for: Solvent atmosphere-assisted crystallization of perovskites for room-temperature continuous-wave amplified spontaneous emission
Source: Royal Society of Chemistry journal article supplement (doi:10.1039/d3tc01797d), 2023-01-01
Supplement: d3tc01797d1.pdf [file d3tc01797d1.pdf]

## Supporting Information

### **Solvent Atmosphere-Assisted Crystallization of Perovskites for Room-Temperature Continuous-Wave Amplified Spontaneous Emission**

Deyue Zou,<sup>ab</sup> Yunpeng Wang,<sup>a</sup> Yan Zhang,<sup>c</sup> Xiaoyang Guo,<sup>\*a</sup> Ying Lv,<sup>a</sup> Jie Lin,<sup>\*d</sup>

Jingsong Huang,<sup>d</sup> Xingyuan Liu<sup>\*a</sup>

<sup>a</sup>State Key Laboratory of Luminescence and Applications, Changchun Institute of Optics, Fine Mechanics and Physics, Chinese Academy of Sciences, Changchun 130033, P. R. China

<sup>b</sup>University of Chinese Academy of Sciences, Beijing 100049, P. R. China

<sup>c</sup>Changchun Up Optotech Co., Ltd., Changchun 130033, P. R. China

<sup>d</sup>Oxford Suzhou Centre for Advanced Research (OSCAR), University of Oxford, Suzhou 215123, P. R. China

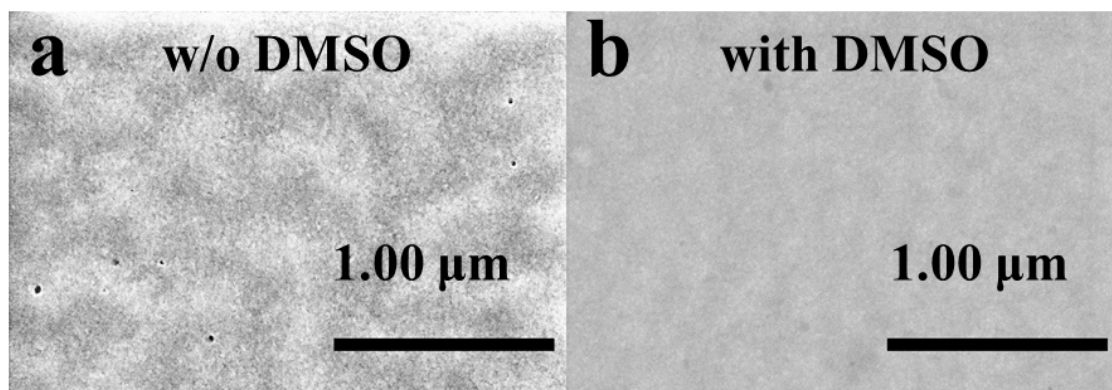

**Figure S1.** SEM images of P2F6 films (a) w/o and (b) with DMSO atmosphere treatment.

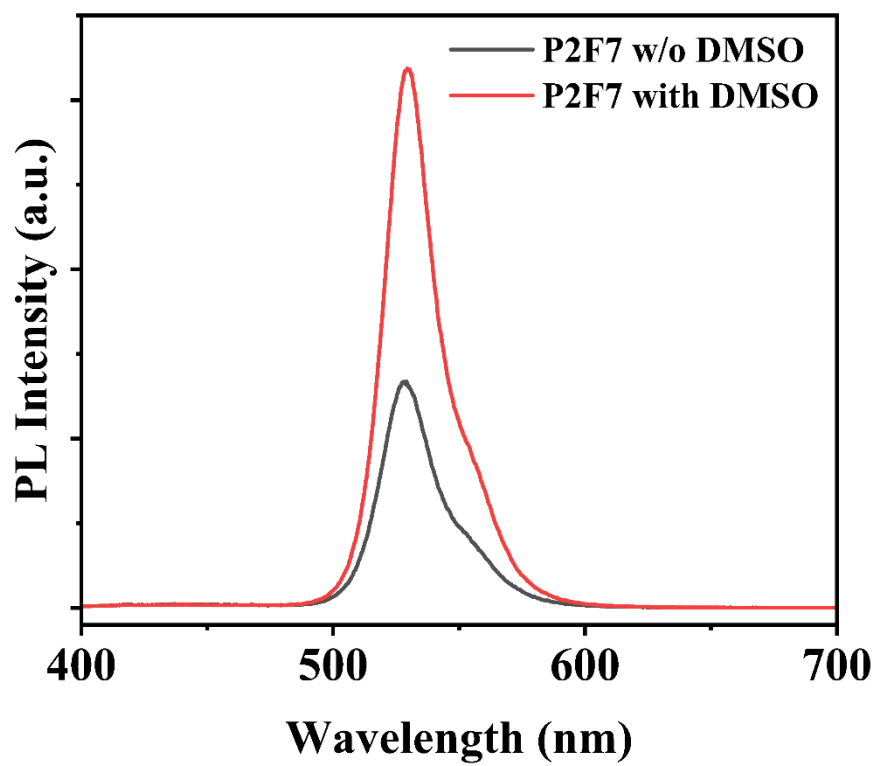

**Figure S2.** PL spectra of P2F7 films with and w/o DMSO treatment.

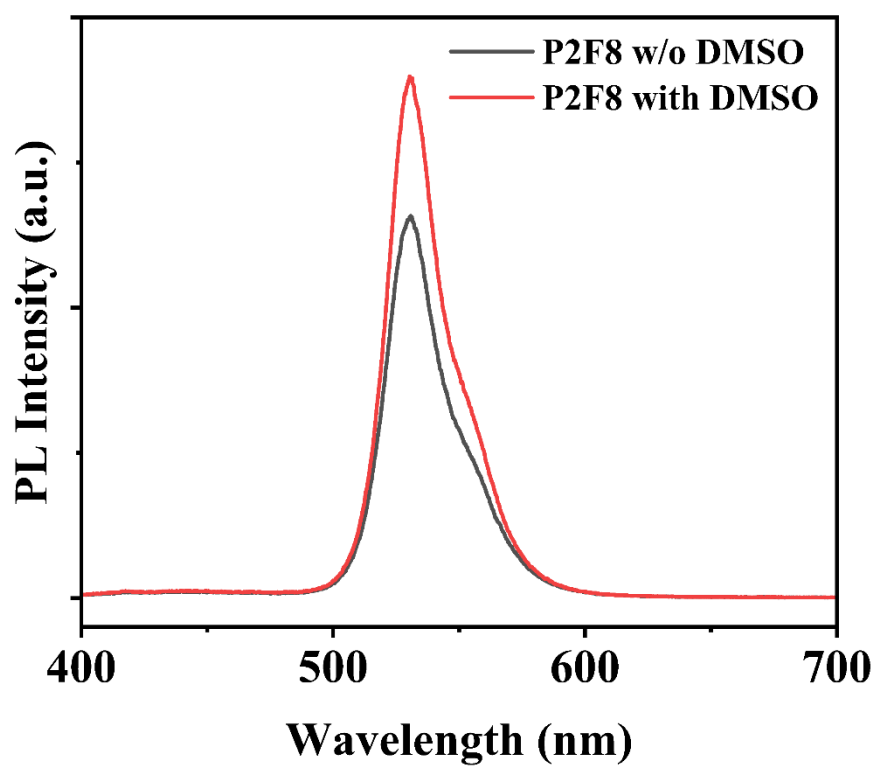

**Figure S3.** PL spectra of P2F8 films with and w/o DMSO treatment.

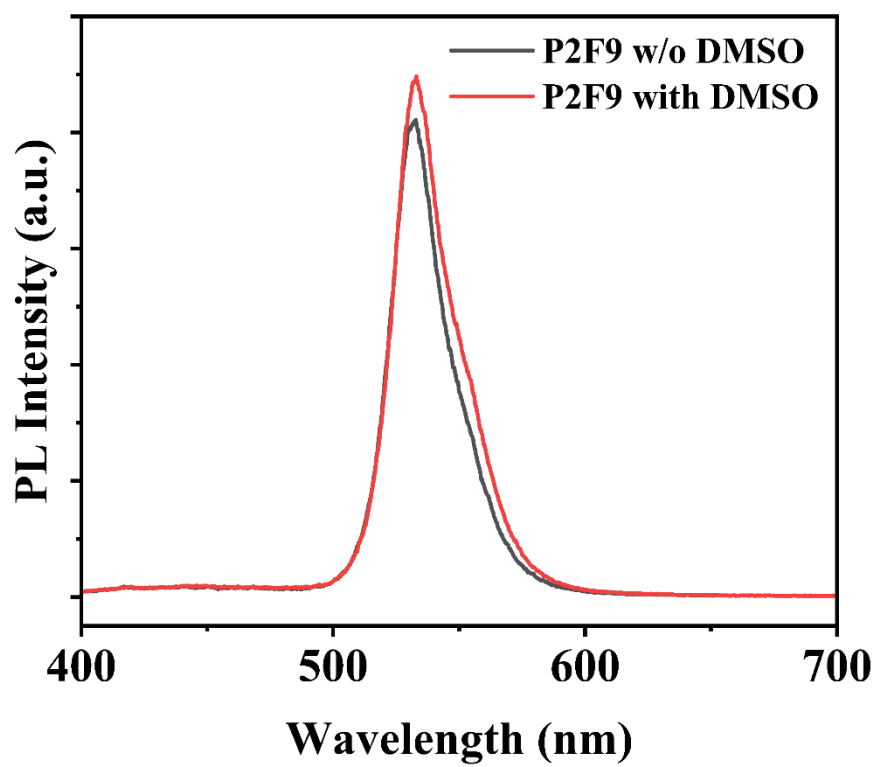

**Figure S4.** PL spectra of P2F9 films with and w/o DMSO treatment.

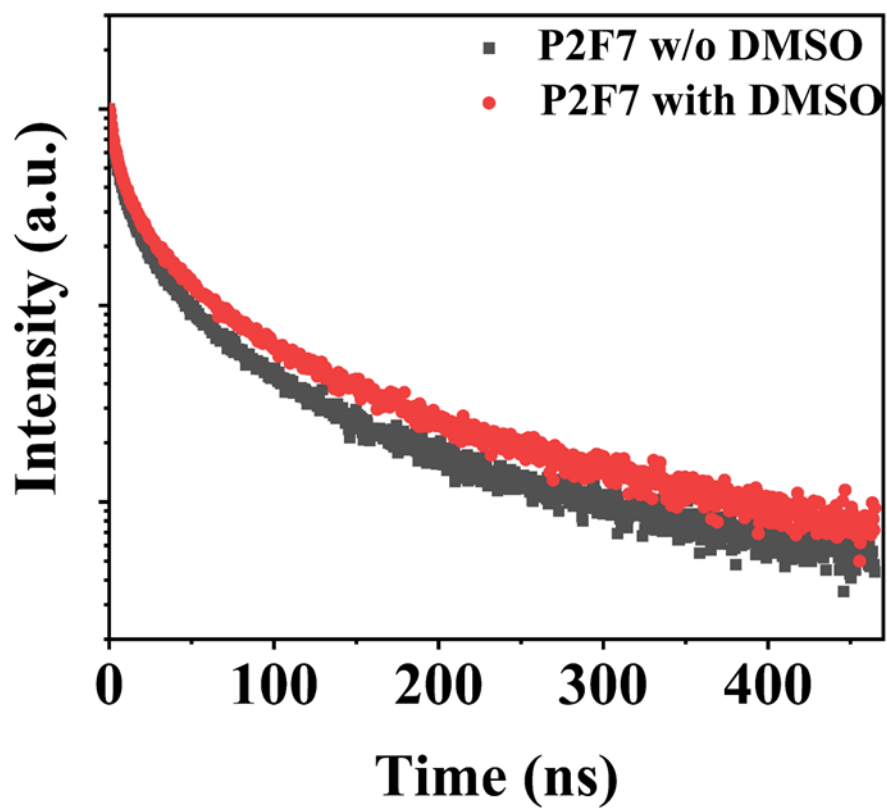

**Figure S5.** Fluorescence lifetime of P2F7 films with and w/o DMSO treatment.

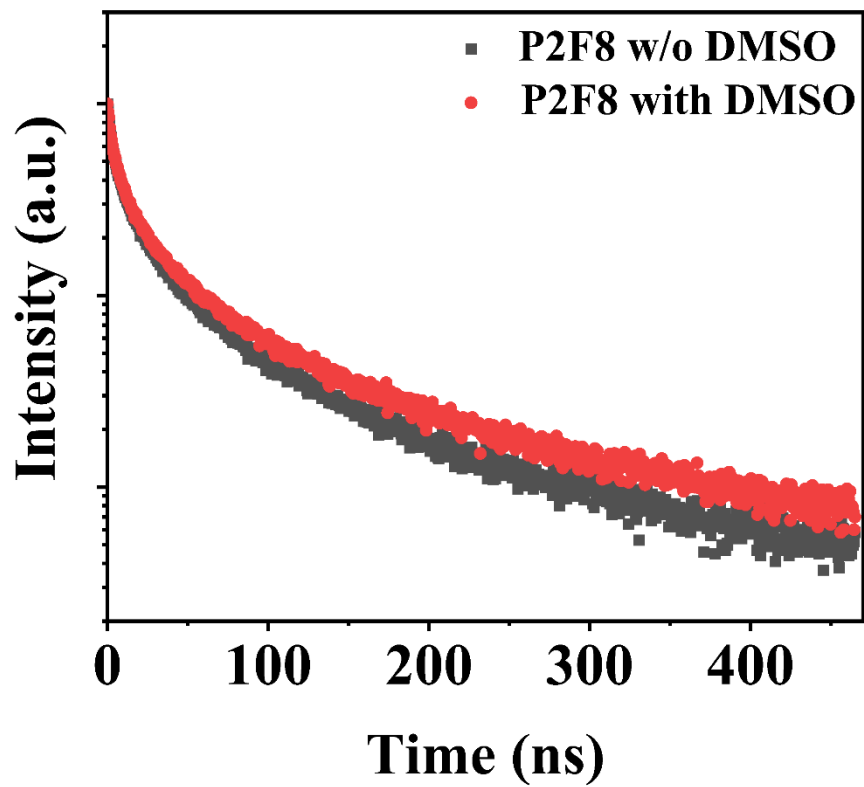

**Figure S6.** Fluorescence lifetime of P2F8 films with and w/o DMSO treatment.

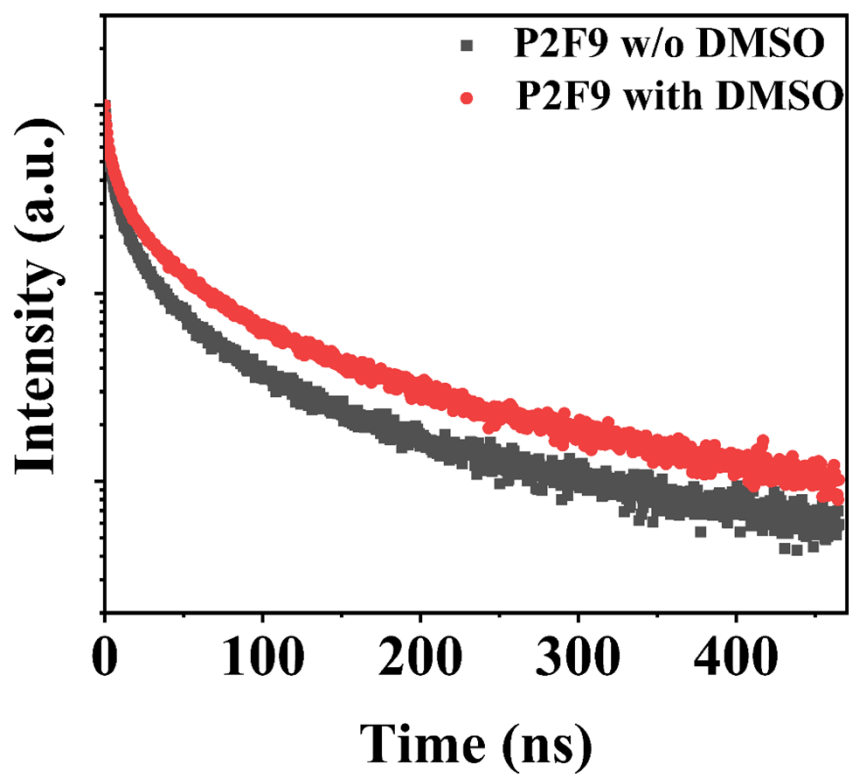

**Figure S7.** Fluorescence lifetime of P2F9 films with and w/o DMSO treatment.



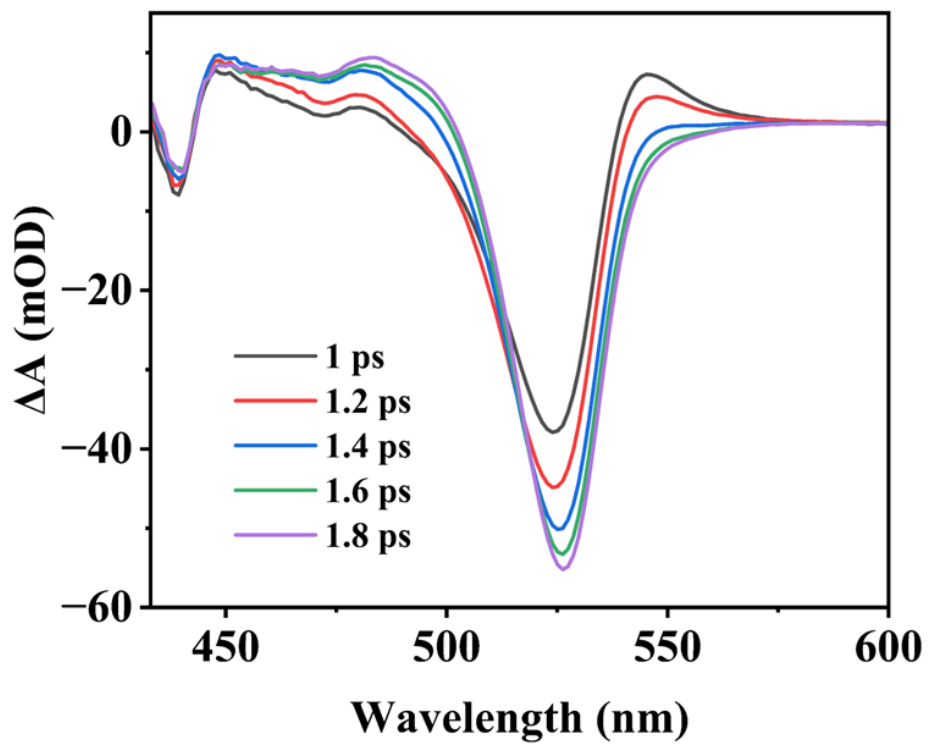

**Figure S8.** TA spectra of the quasi-2D perovskite P2F6 film w/o DMSO treatment at selected time scales.

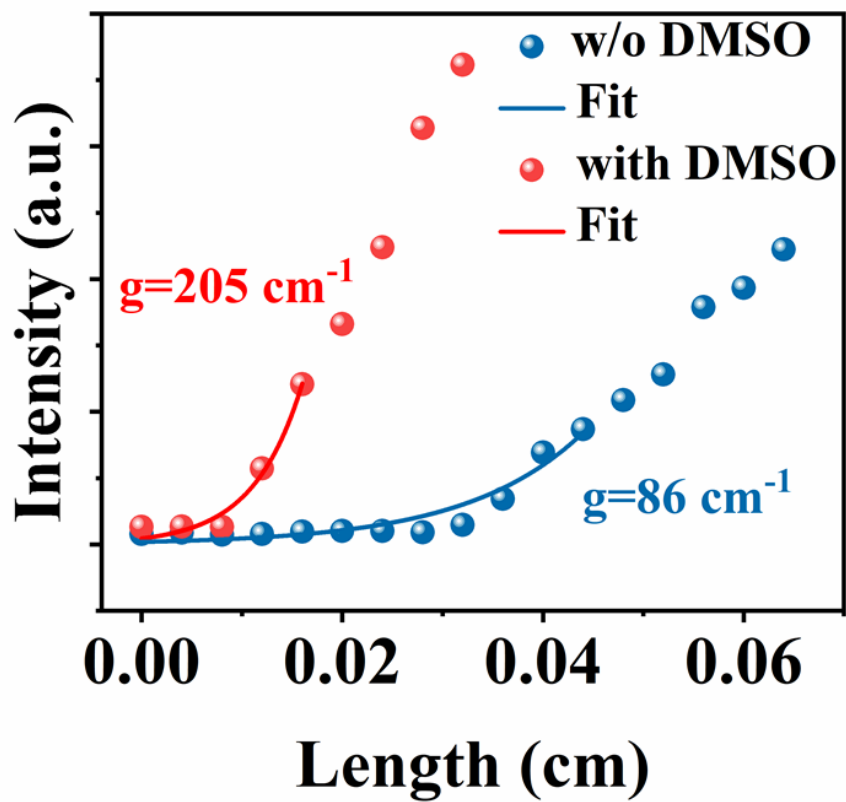

**Figure S9.** PL intensity of the perovskite films with and w/o DMSO treatment as a function of stripe length under the energy densities of  $10 P_{th}$  of the two films.

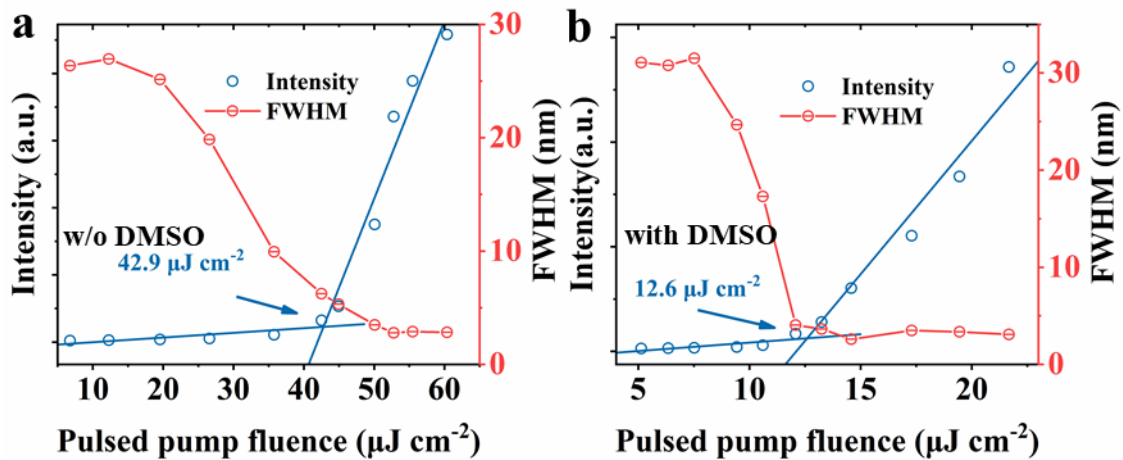

**Figure S10.** The output intensity and FWHM of the P2F7 films (a) w/o DMSO and (b) with DMSO treatment as a function of the pump fluence.

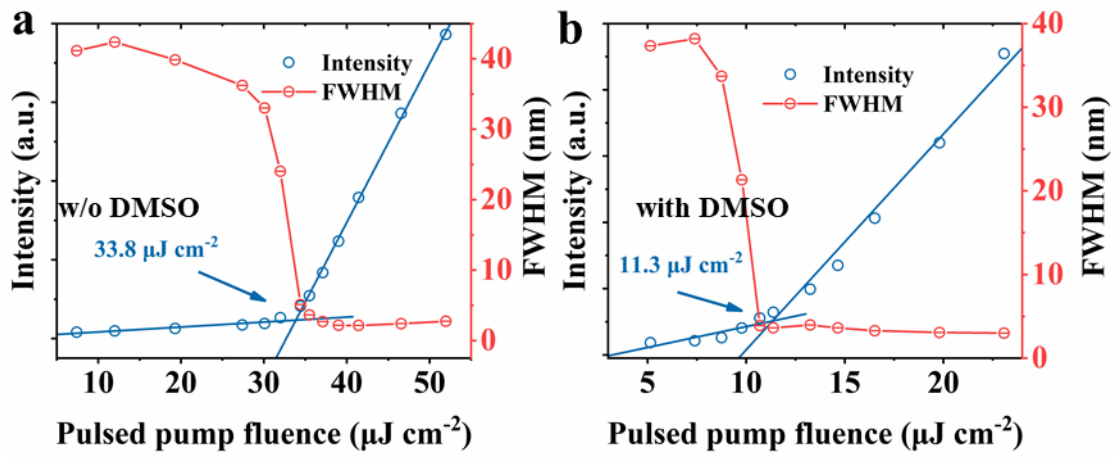

**Figure S11.** The output intensity and FWHM of the P2F8 films (a) w/o DMSO and (b) with DMSO treatment as a function of the pump fluence.

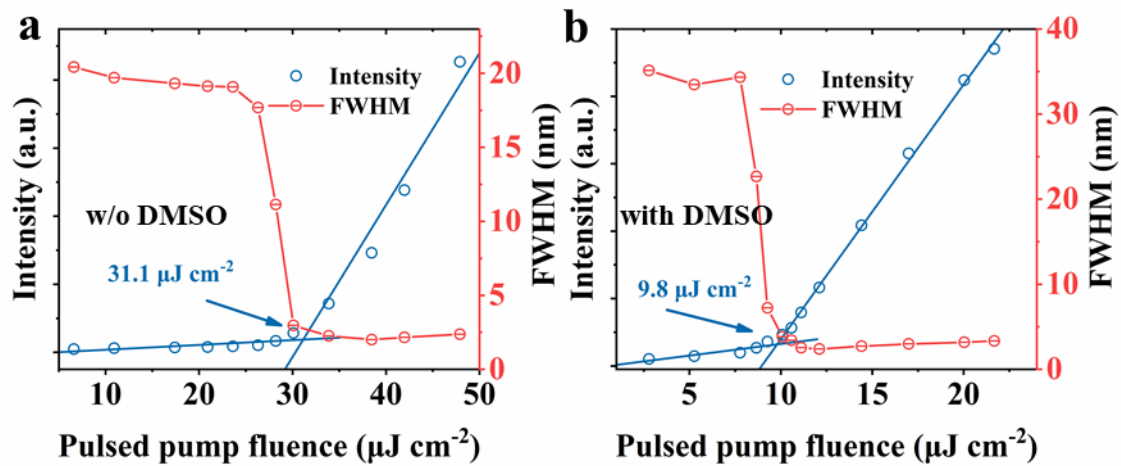

**Figure S12.** The output intensity and FWHM of the P2F9 films (a) w/o DMSO and (b) with DMSO treatment as a function of the pump fluence.

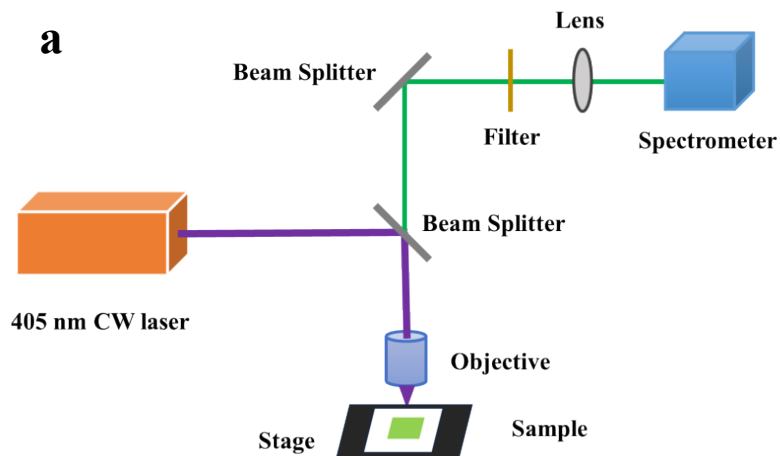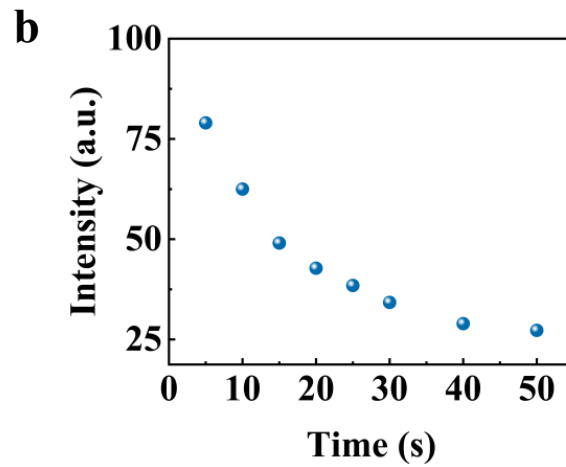

**Figure S13.** (a) Experimental set-up for emission stability of perovskite films under optical pumping; (b) The luminescence intensity of the perovskite film varies with time at a constant optical pumping power of  $2 \text{ mW/cm}^2$ .

**Table S1.** Fluorescence lifetime, non-radiative recombination rates ( $K_{nr}$ ), and optical pumping ASE threshold of different perovskite films with and w/o DMSO treatment.

|                                        | P2F6  | P2F7  | P2F8  | P2F9  |
|----------------------------------------|-------|-------|-------|-------|
| $\tau_{avg}$ (w/o)<br>(ns)             | 47.09 | 57.55 | 59.13 | 63.04 |
| $\tau_{avg}$ (with)<br>(ns)            | 65.66 | 72.94 | 75.71 | 84.18 |
| $K_{nr}$ (w/o)<br>( $10^7s^{-1}$ )     | 1.6   | 1.4   | 1.5   | 1.4   |
| $K_{nr}$ (with)<br>( $10^7s^{-1}$ )    | 1.1   | 1.0   | 1.2   | 1.0   |
| $P_{th}$ (w/o)<br>( $\mu J cm^{-2}$ )  | 46.7  | 42.9  | 33.8  | 31.1  |
| $P_{th}$ (with)<br>( $\mu J cm^{-2}$ ) | 12.9  | 12.6  | 11.3  | 9.8   |

**Table S2.** The fitted time constant for transient absorption spectra of different quasi-2D perovskite films probed at different wavelength.

|           | Wavelength<br>(nm) | $\tau_{rise}$<br>(ps) | $\tau_{decay}$<br>(ps) | $\tau_{decay}'$<br>(ps) | $\tau_1$<br>(ps) | $\tau_2$<br>(ps) |
|-----------|--------------------|-----------------------|------------------------|-------------------------|------------------|------------------|
| w/o DMSO  | n=2 (439)          | 0.73                  | 0.27                   | 14.96                   |                  |                  |
|           | n>5 (524)          | 0.95                  | 2.43                   |                         | 123.81           | 798.37           |
| with DMSO | n=2 (439)          | 0.42                  | 0.36                   | 23.02                   | 125.97           |                  |
|           | n=3 (473)          | 0.44                  | 0.43                   |                         | 254.42           | 1625.66          |
|           | n=4 (494)          | 0.77                  | 0.32                   |                         | 155.25           | 966.89           |
|           | n>5 (524)          | 0.54                  | 1.88                   |                         | 99.43            | 705.79           |

$\tau_{rise}$  is the rise time.  $\tau_{decay}$ ,  $\tau_{decay}'$ ,  $\tau_1$ , and  $\tau_2$  are the relaxation time.
